# Supplementary material for: SOCS2 is dispensable for BCR/ABL1-induced chronic myeloid leukemia-like disease and for normal hematopoietic stem cell function
Source: PubMed Central journal article supplement — Leukemia. 2012 Jul 24;27(1):130–5. doi: 10.1038/leu.2012.169 (PMC3542906; doi:10.1038/leu.2012.169), 2012-07-24
Supplement: leu2012169x1.pdf [file leu2012169x1.pdf]

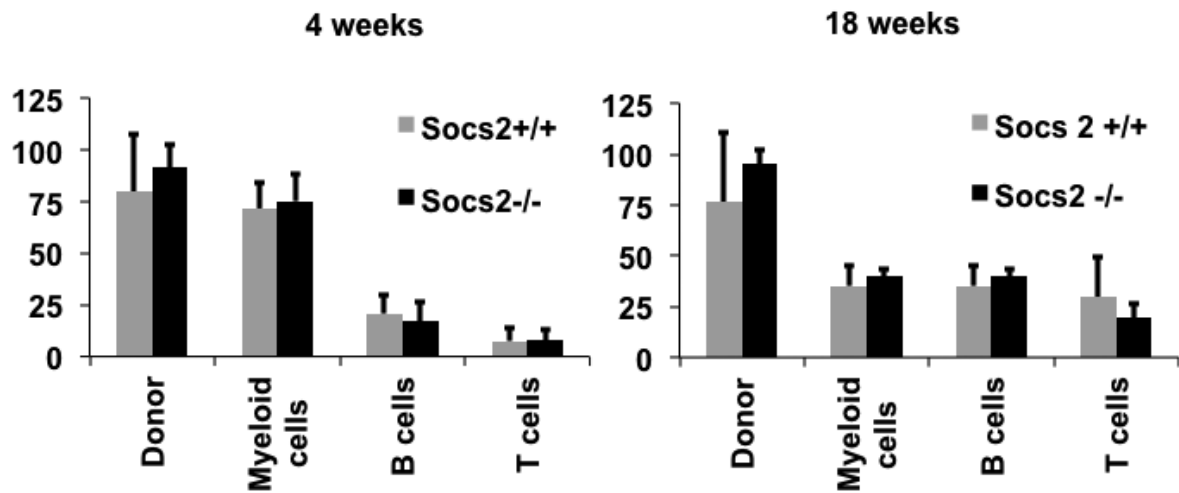

**Supplementary Figure 1.** Hematopoietic reconstitution in secondary bone marrow recipients. Repopulation to peripheral blood is shown 4 and 18 weeks after transplantation, as the percentage of donor cells compared to the total amount of donor and competitor cells. Bars indicating lineage distribution within the donor cell population.

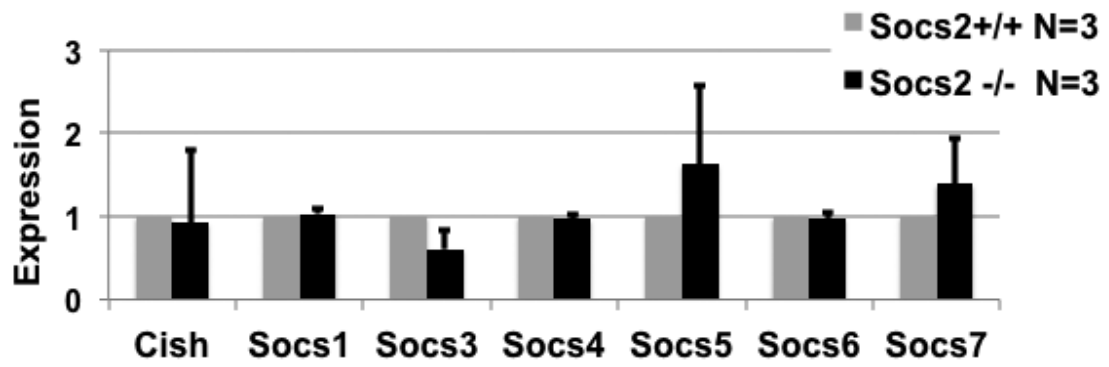

**Supplementary Figure 2.** Expression of the *Socs* family genes in sorted CMPs from *Socs2<sup>+/+</sup>* and *Socs2<sup>-/-</sup>* mice. Expression is relative to *Actb* and compared to the expression of each *Socs* family member in *Socs2<sup>+/+</sup>* cells.

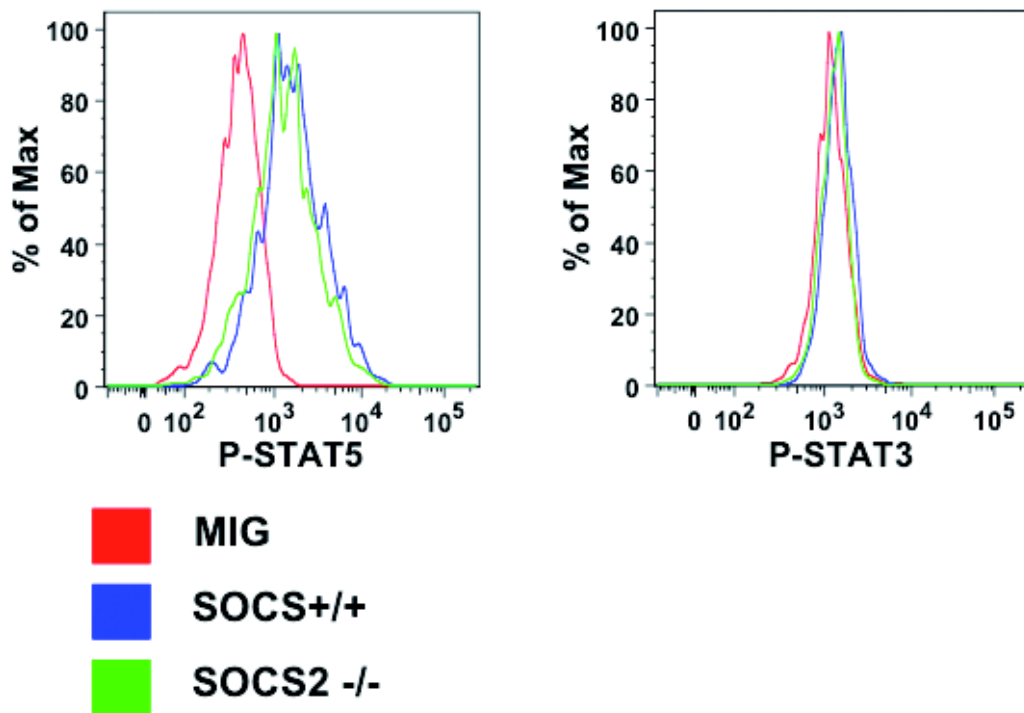

**Supplementary Figure 3.** Intracellular flow cytometric analysis of phosphorylated STAT5 and STAT3 48 hours after transduction of C-kit enriched cells with *BCR/ABL1* or empty MIG control vector. The histograms show the phosphorylation in GFP<sup>+</sup> cells.
